# Supplementary material for: Dynamic regulation of myofibroblast phenotype in cellular senescence
Source: PubMed Central journal article supplement (PMC9009235; doi:10.1111/acel.13580), 2022-03-09

**A**

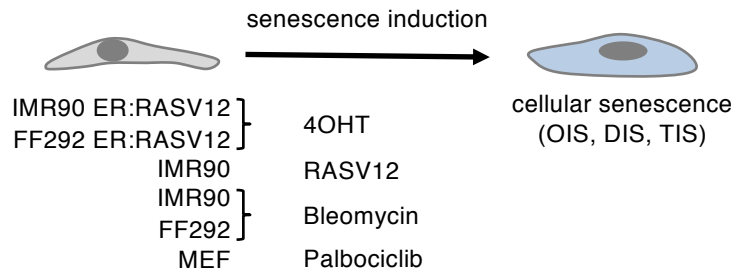

**B**

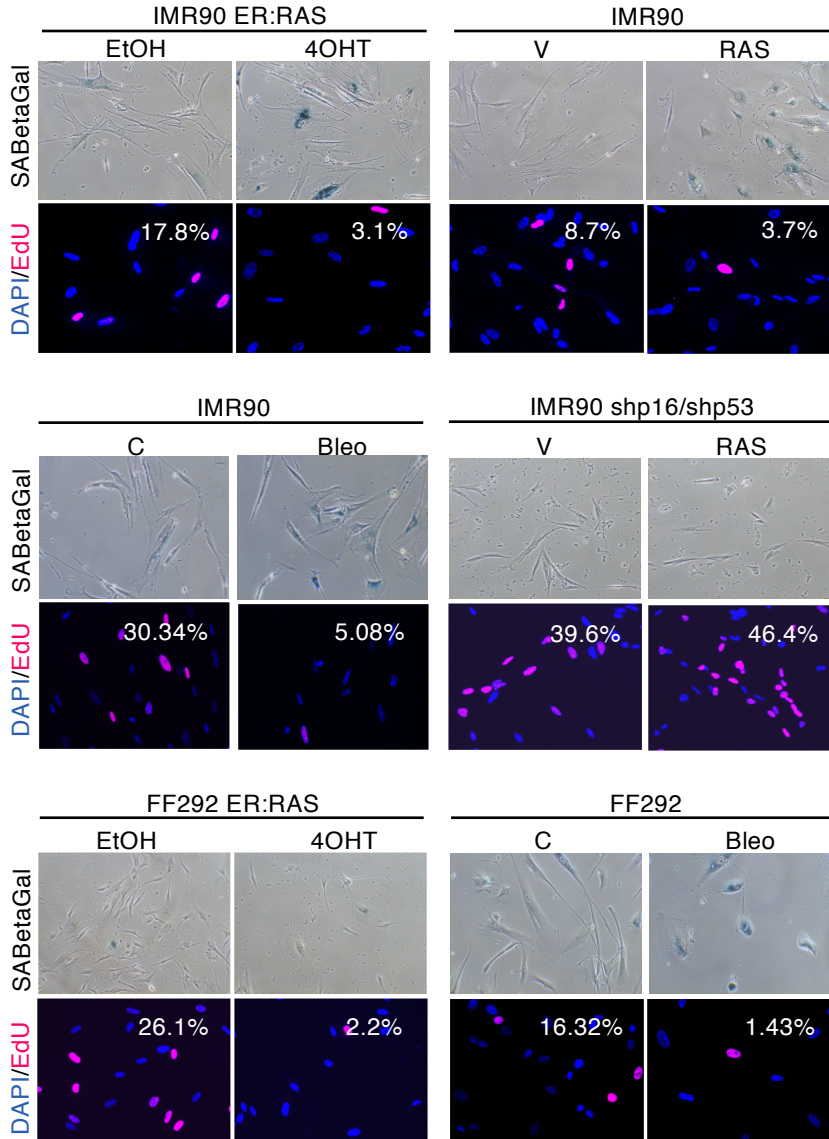

**C**

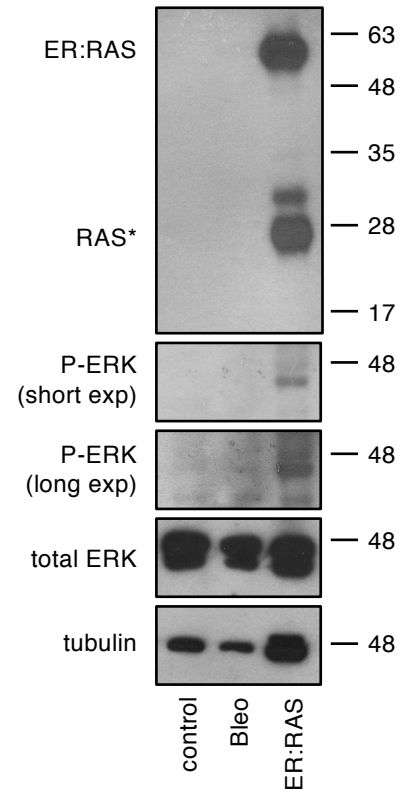

**D**

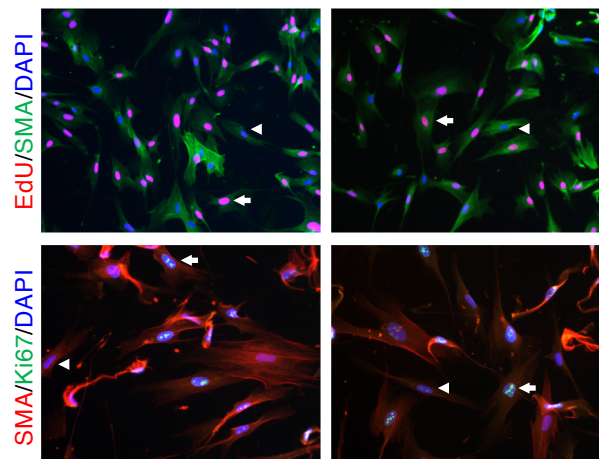

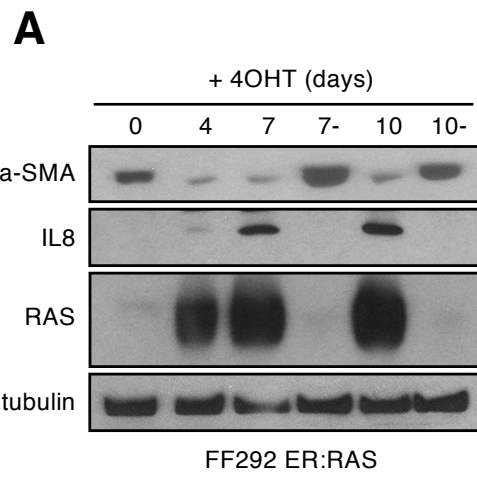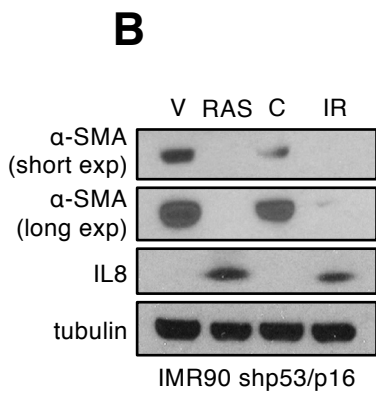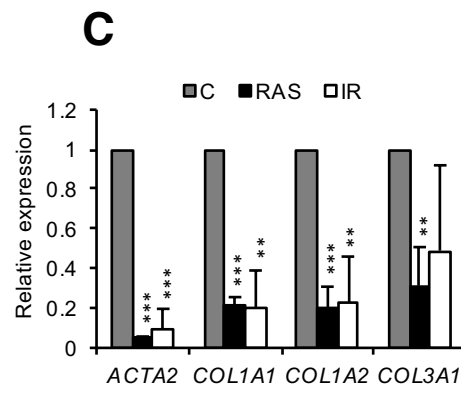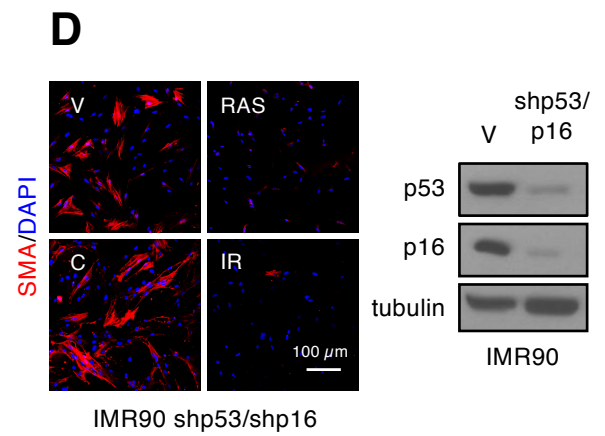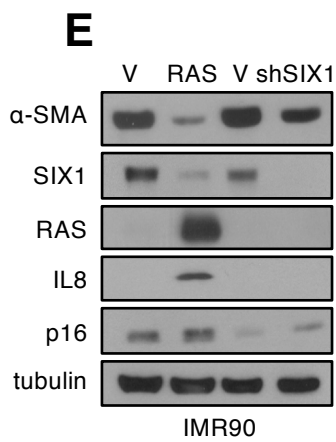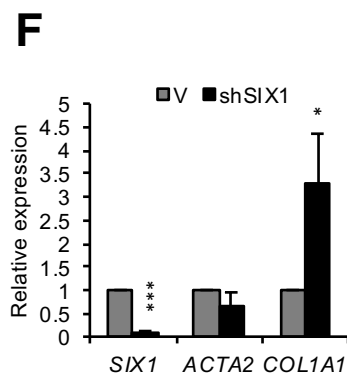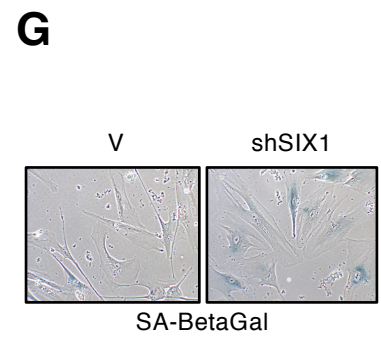



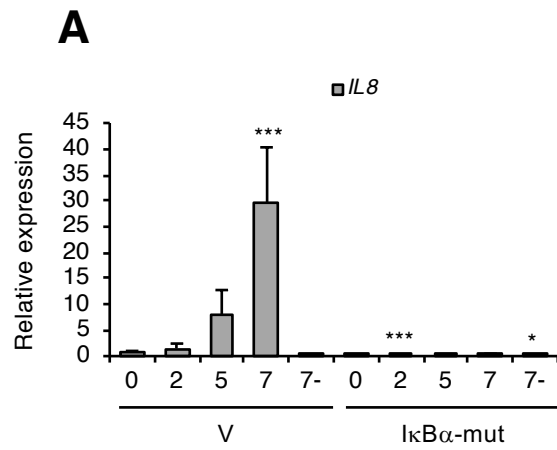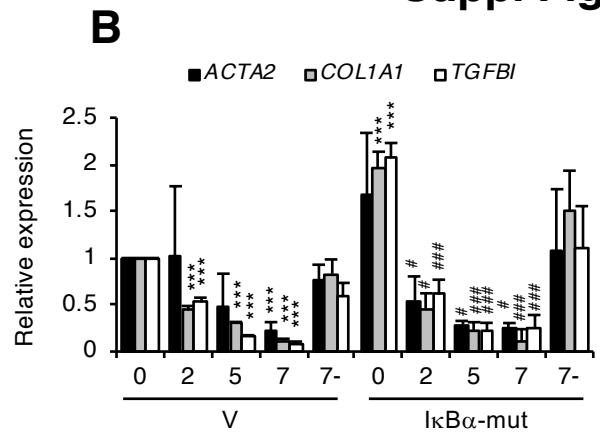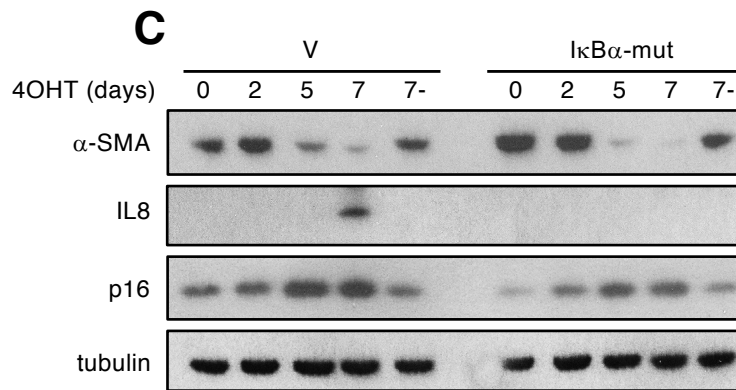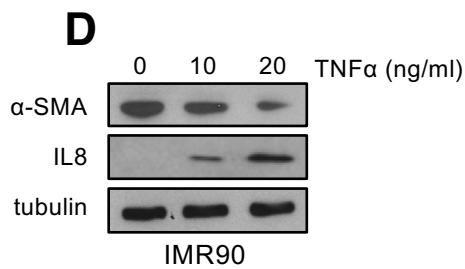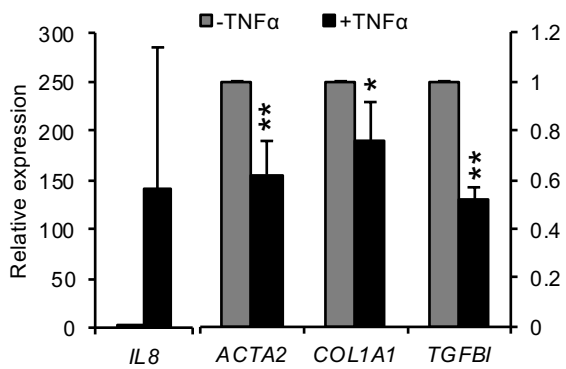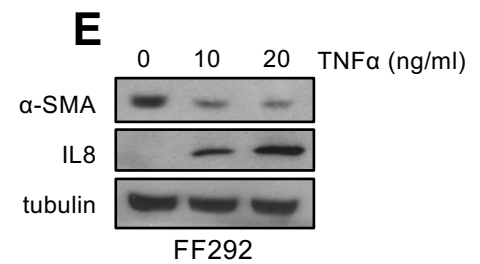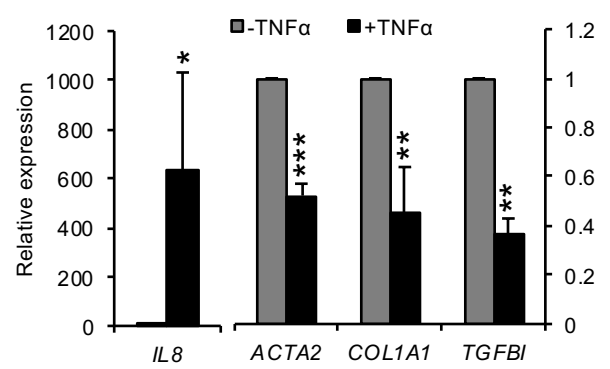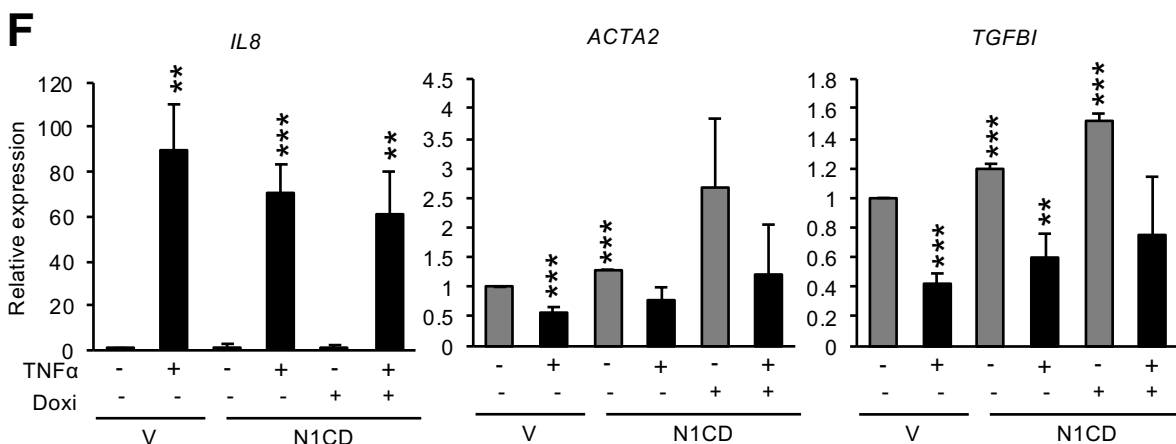

# Suppl Figure 4

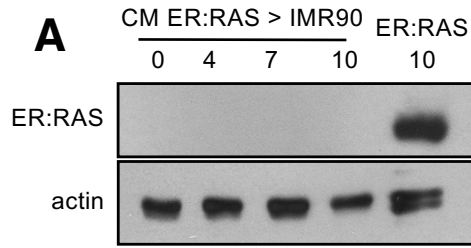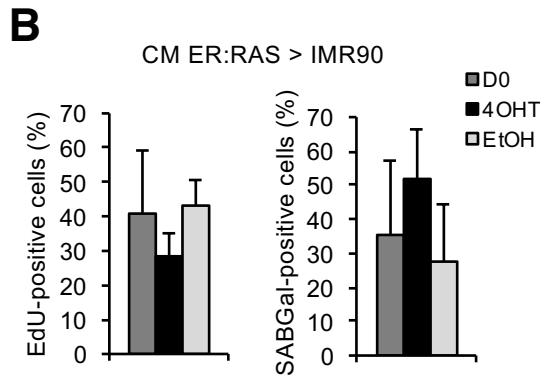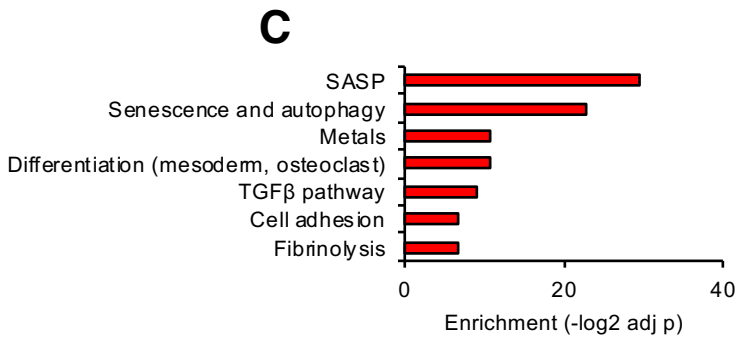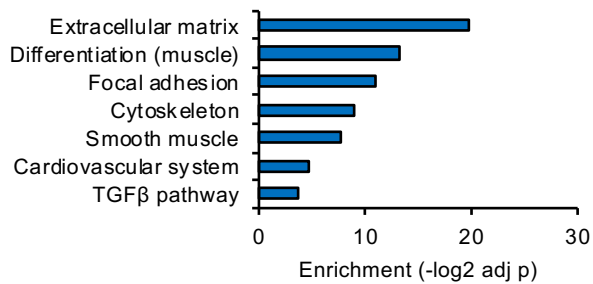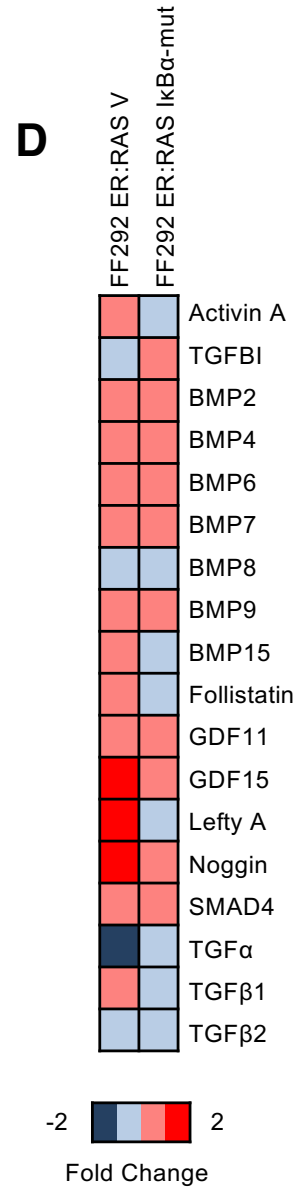

# Suppl Figure 5

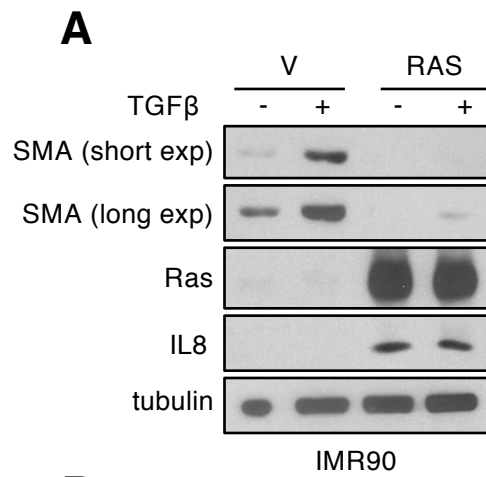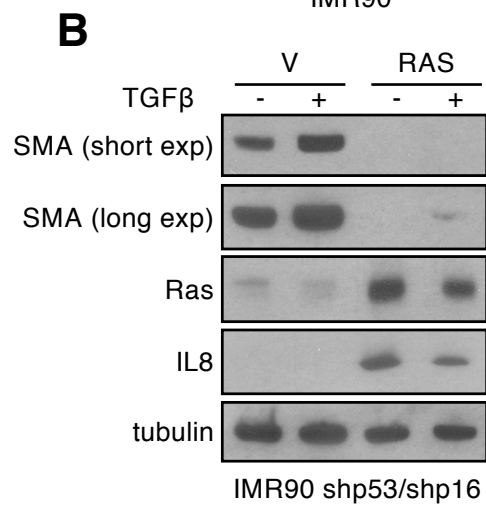

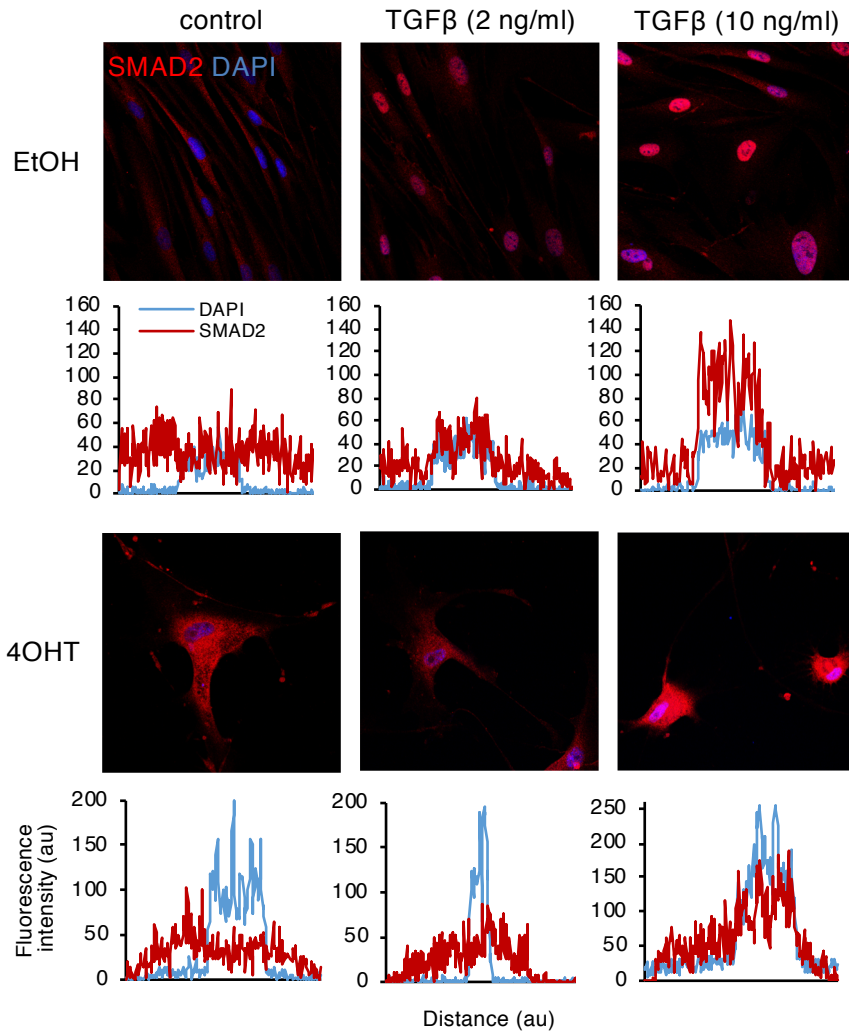



**A**

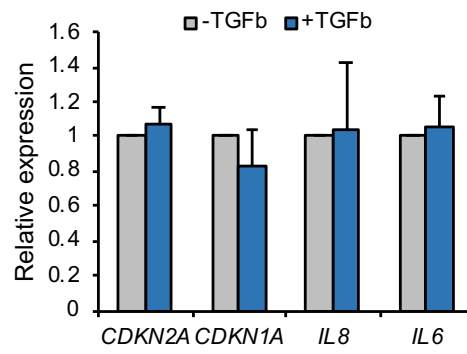

**B**

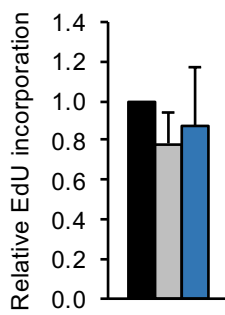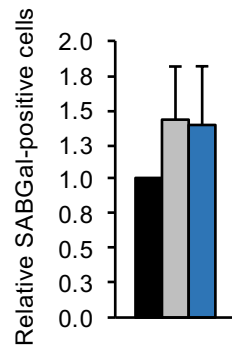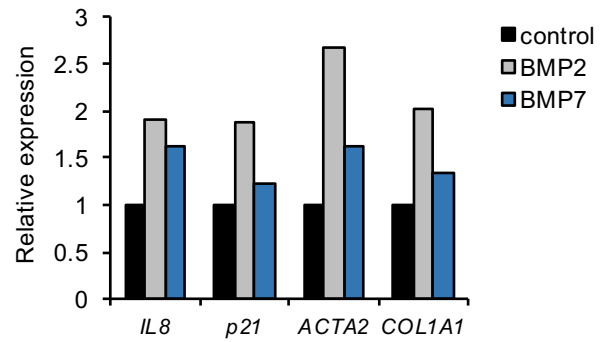

Figure 1A

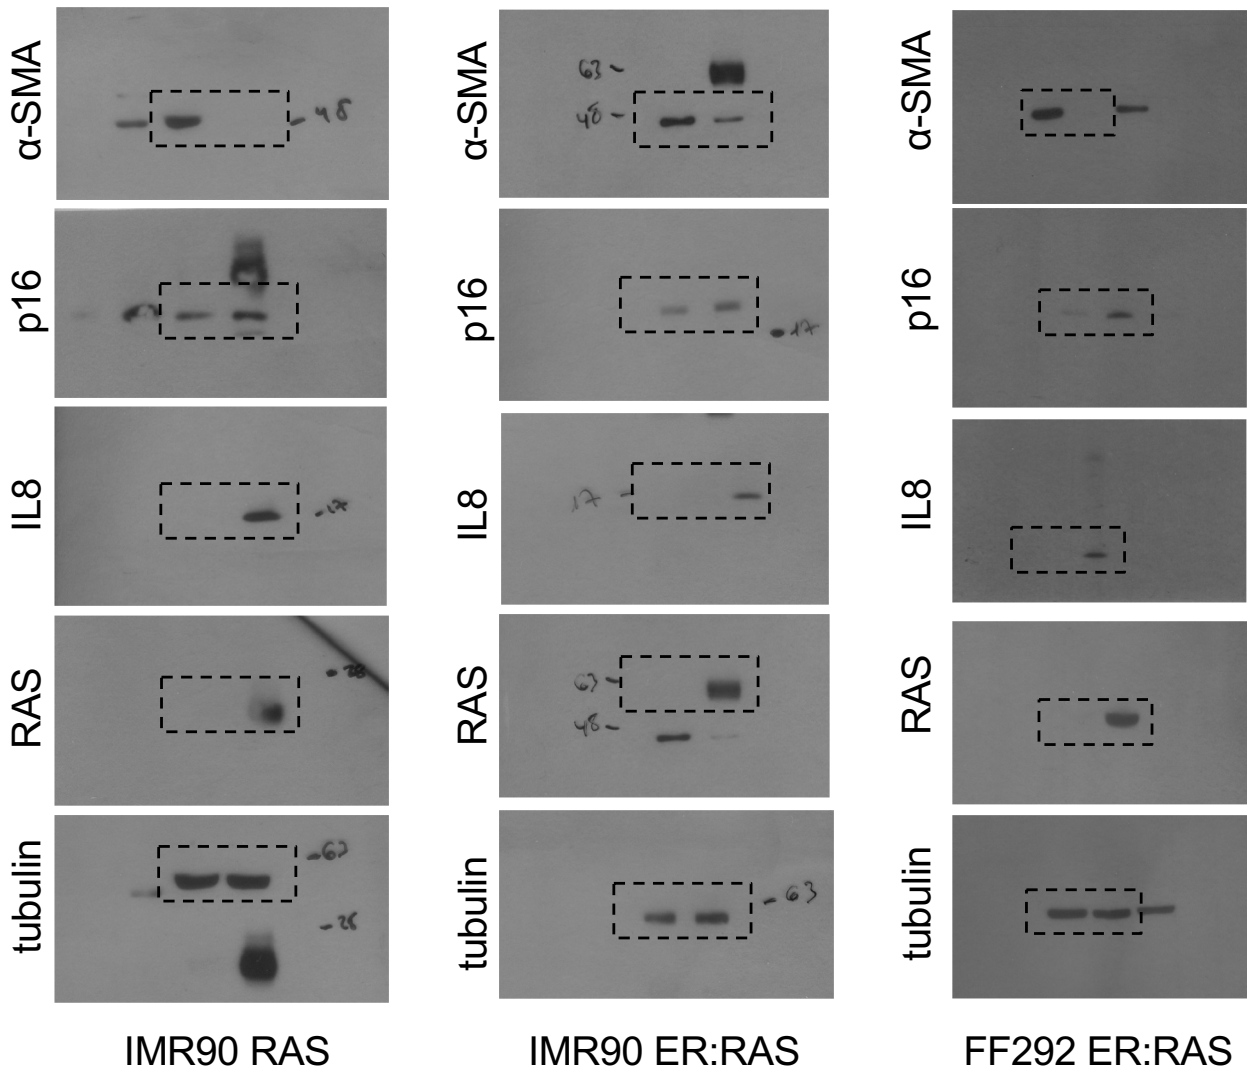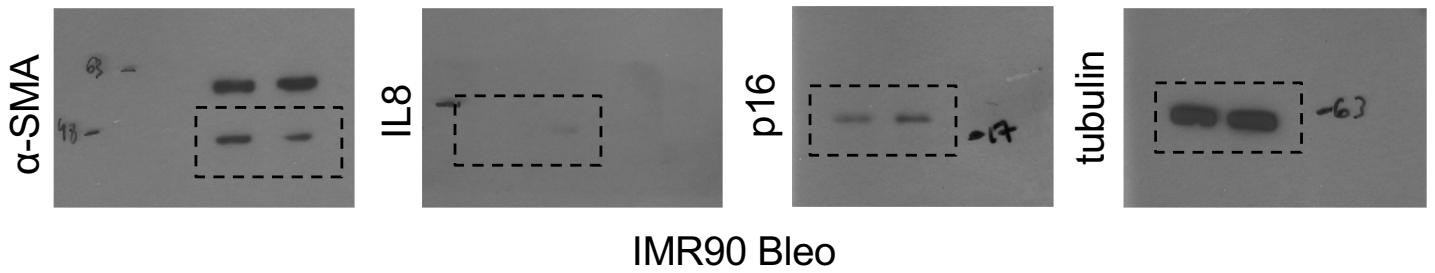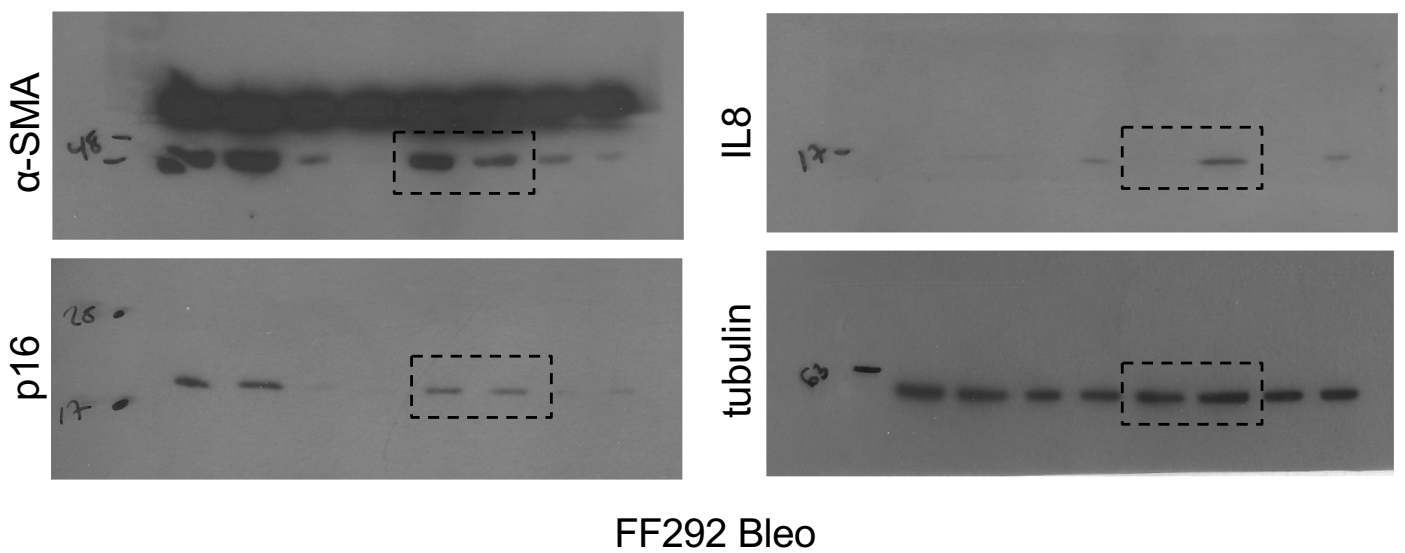

Figure 1C

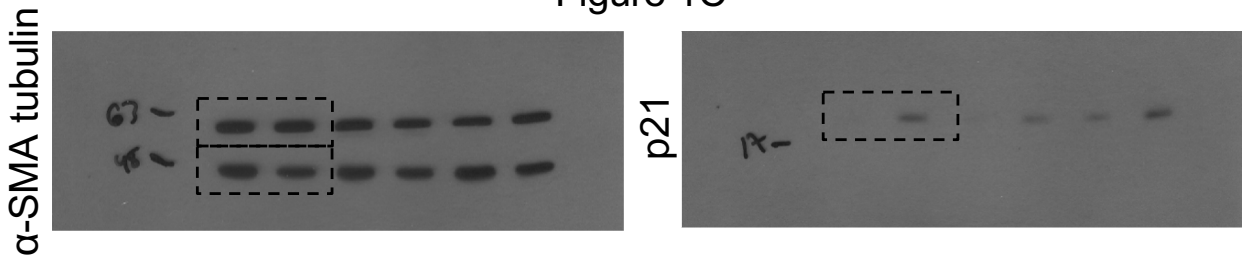

Figure 2A

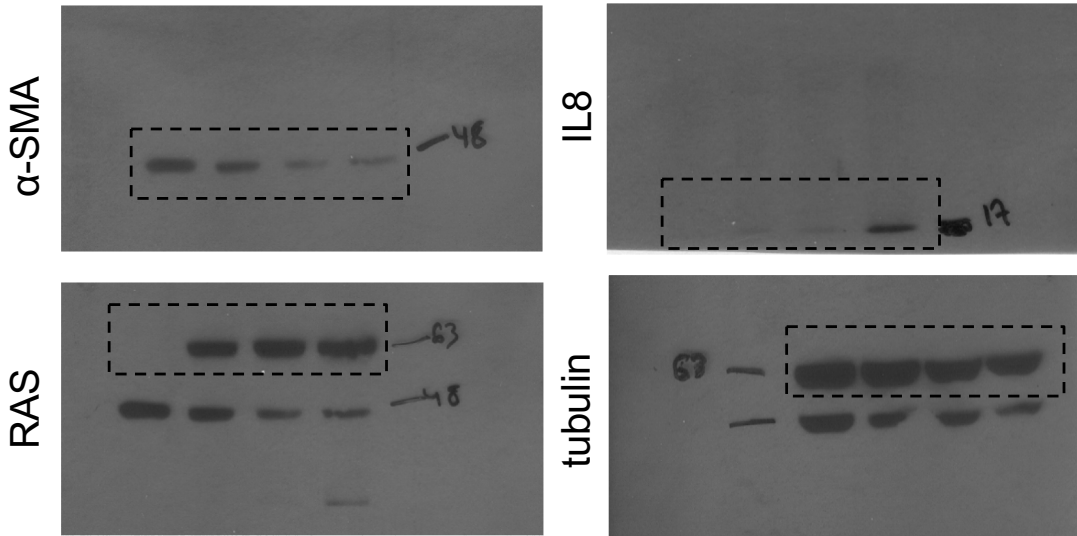

Figure 2G

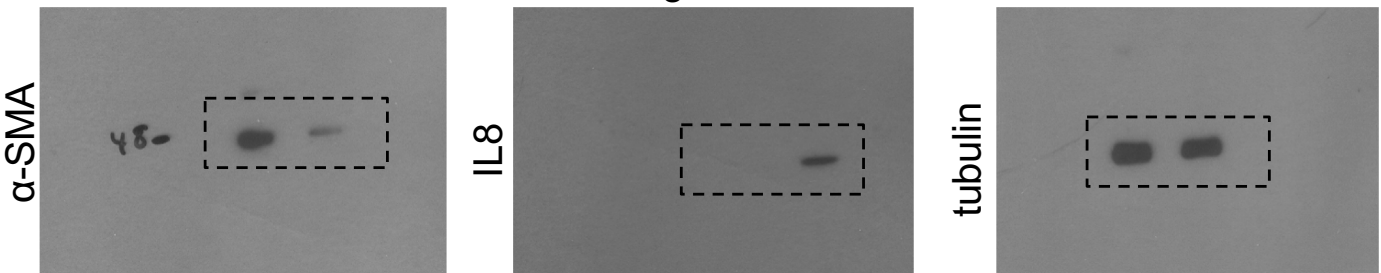

Figure 3C

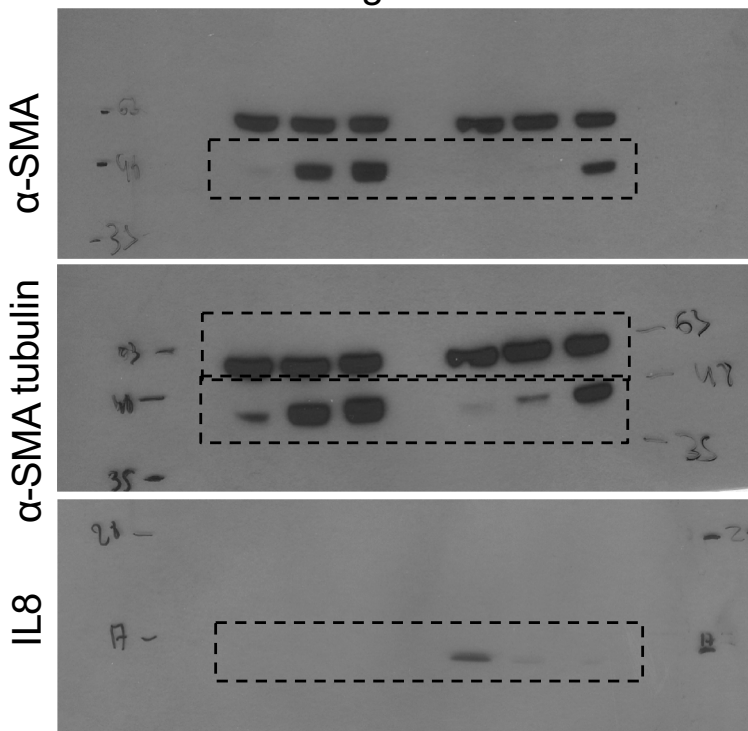

Figure 3F

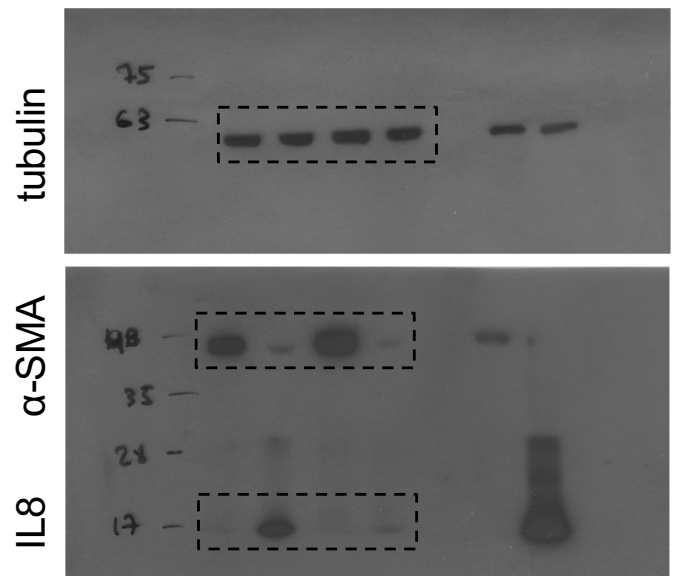

Figure 4D

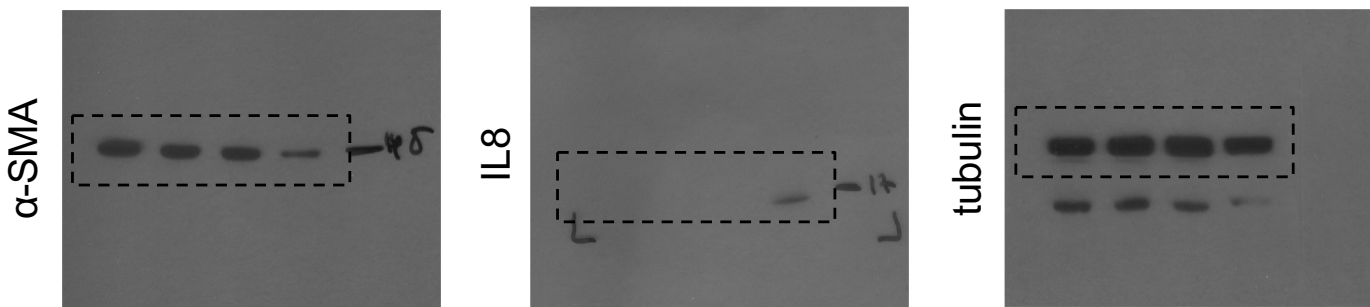

Figure 5A

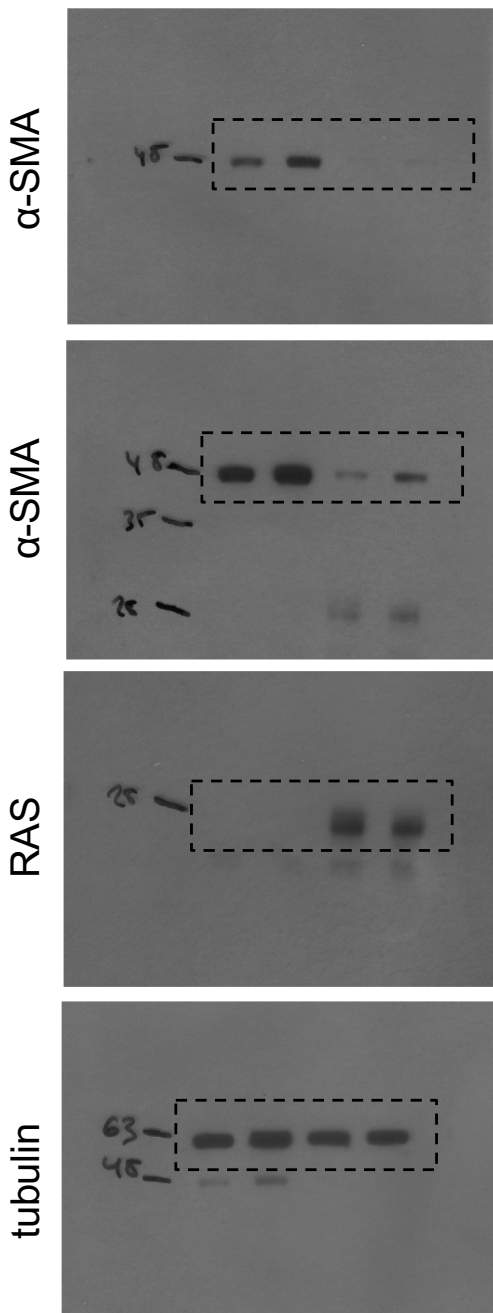

Figure 5F

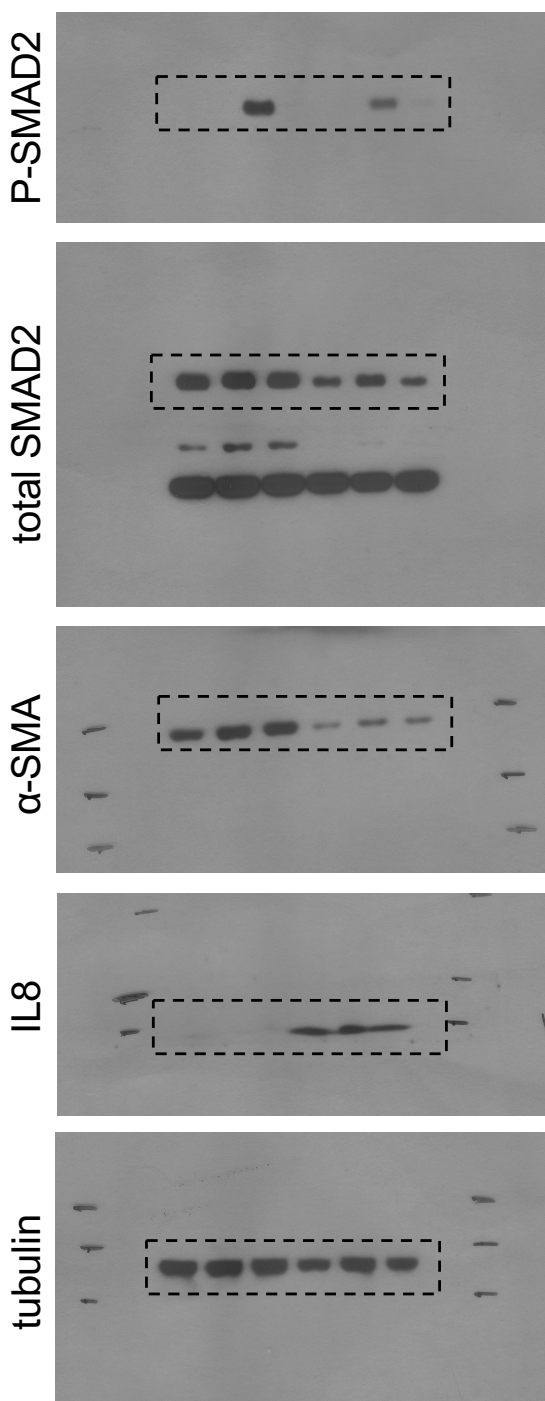

Supp Figure 1C

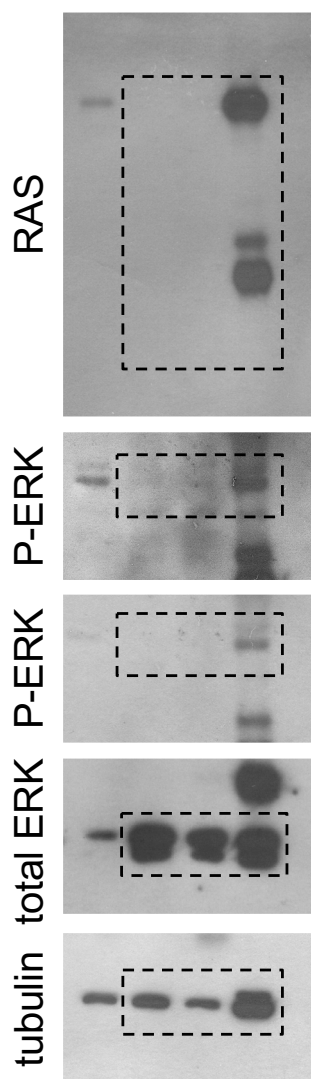



Supp Figure 2A

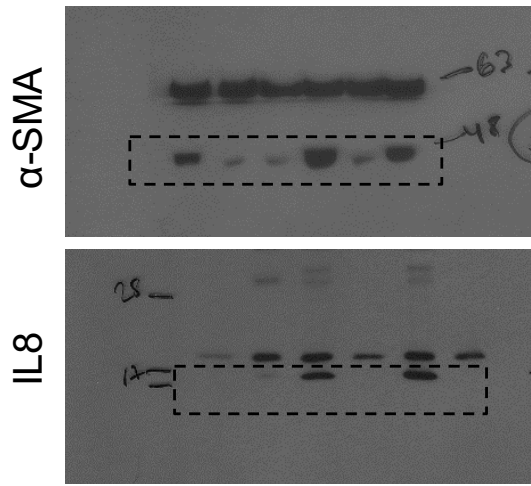

Supp Figure 8 cont

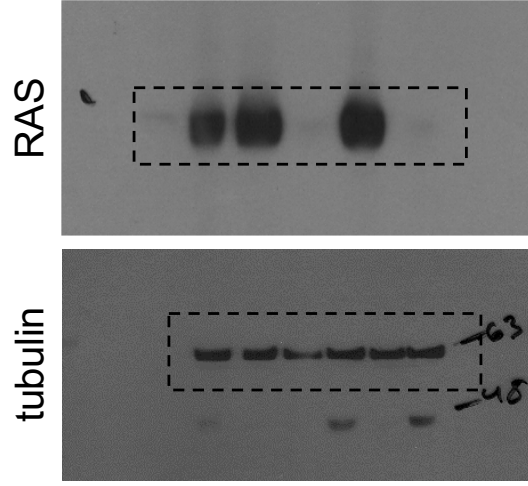

Supp Figure 2B

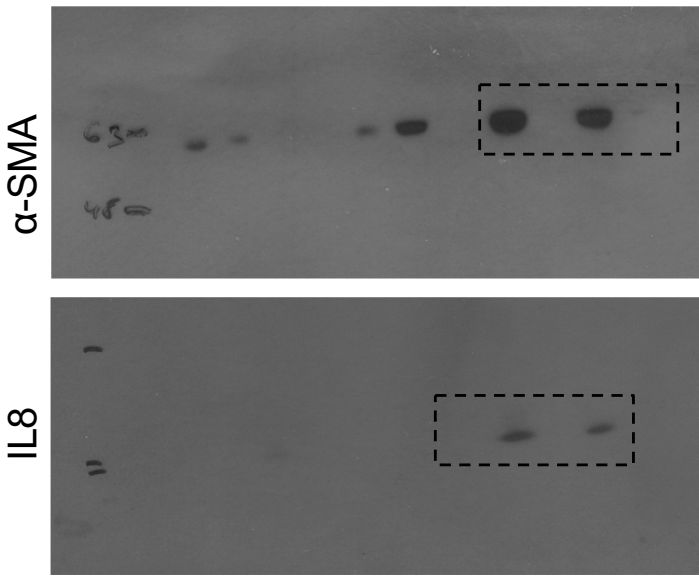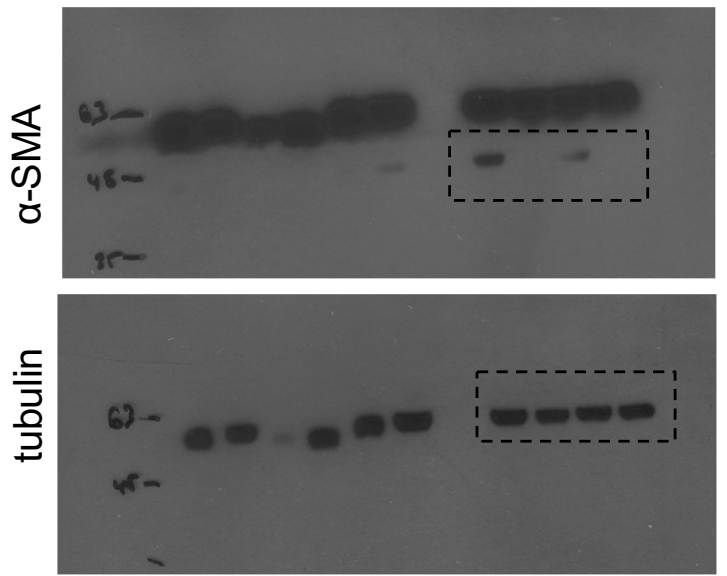

Supp Figure 2D

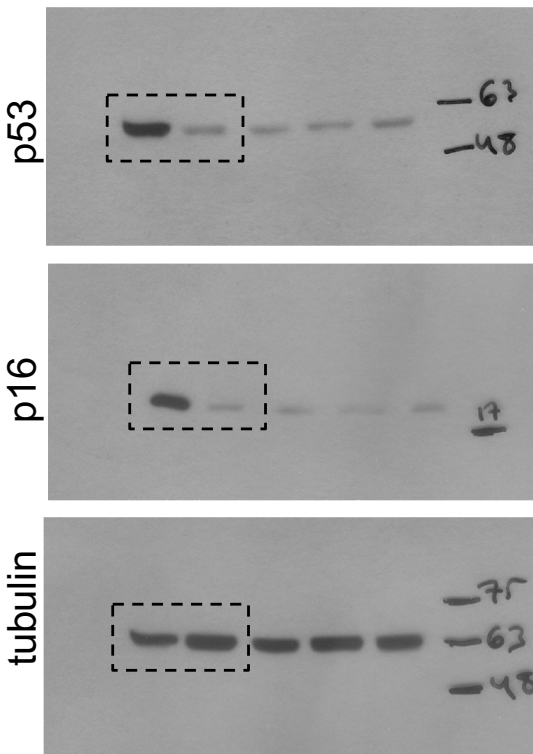

Supp Figure 2E

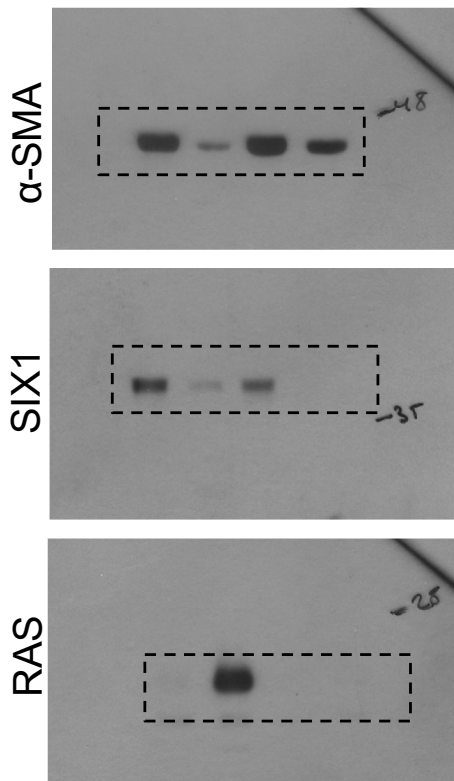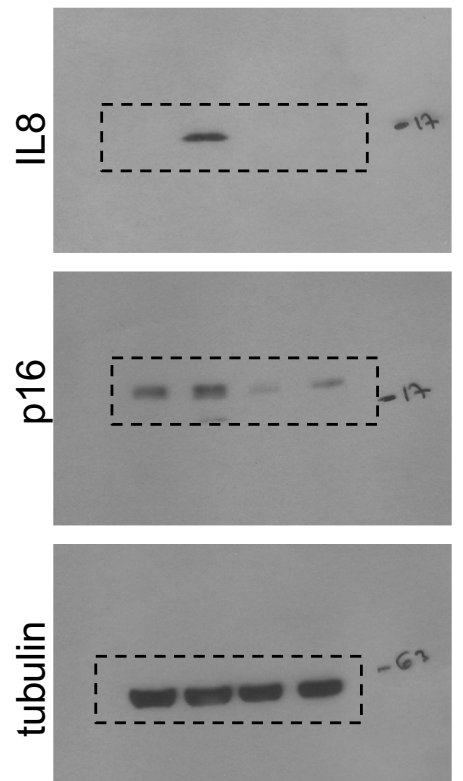

Supp Figure 3C

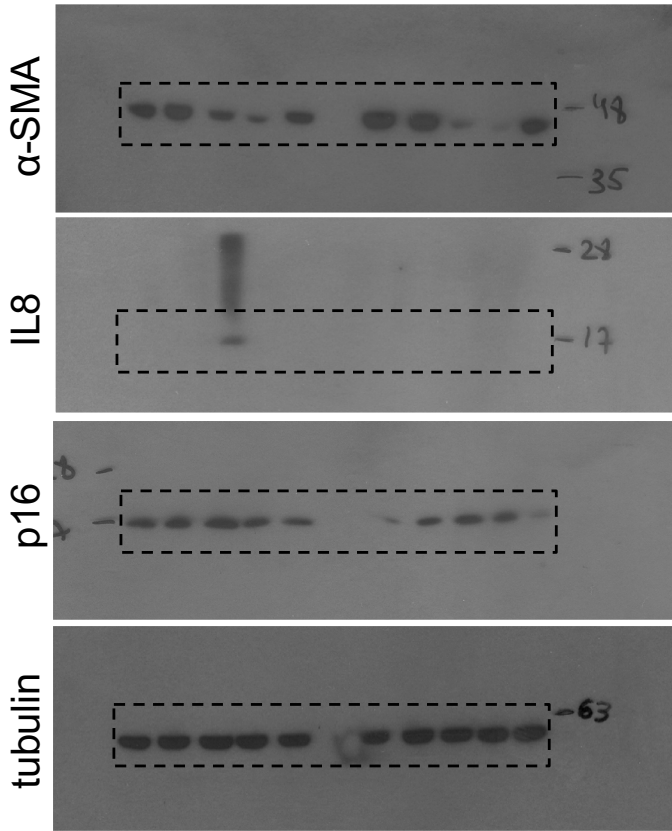

Supp Figure 3D

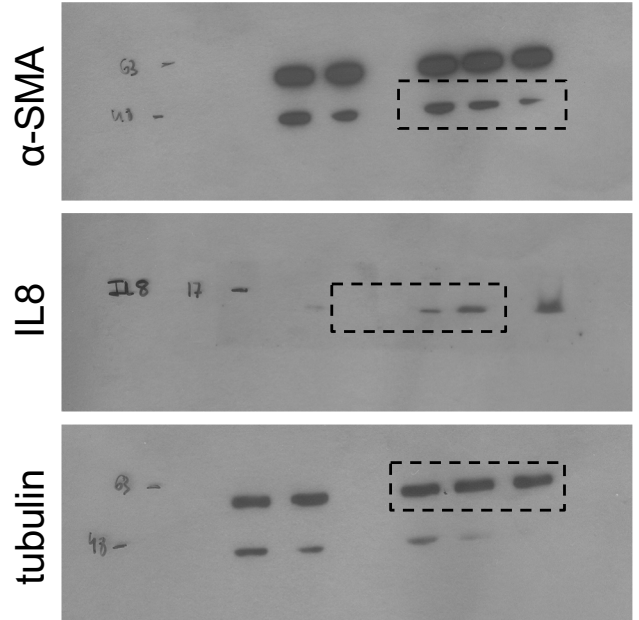

Supp Figure 3E

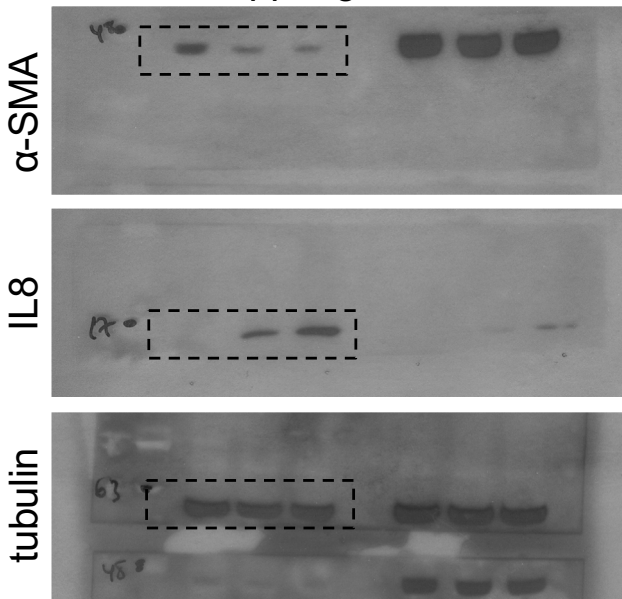

Supp Figure 4A

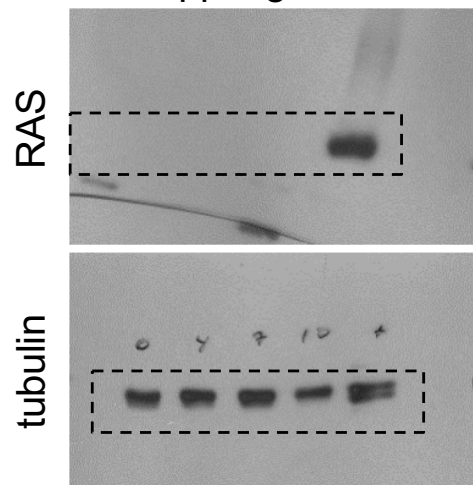

# Supp Figure 8 cont

## Supp Figure 5A

$\alpha$ -SMA

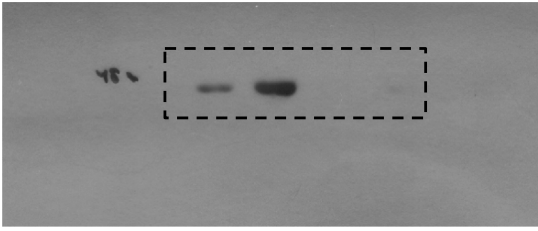

$\alpha$ -SMA

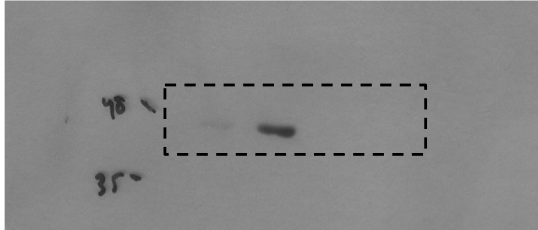

IL8

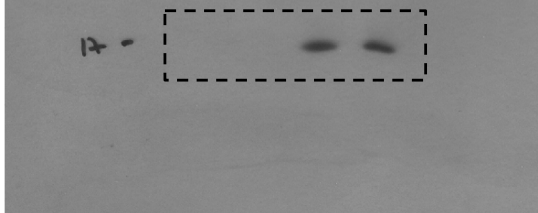

RAS

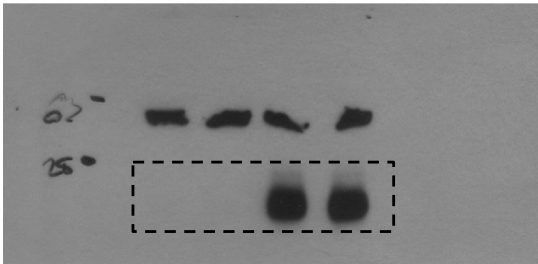

tubulin

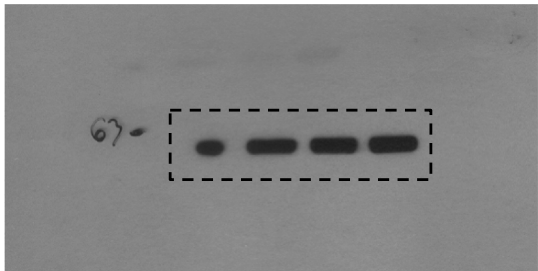

## Supp Figure 5B

$\alpha$ -SMA tubulin

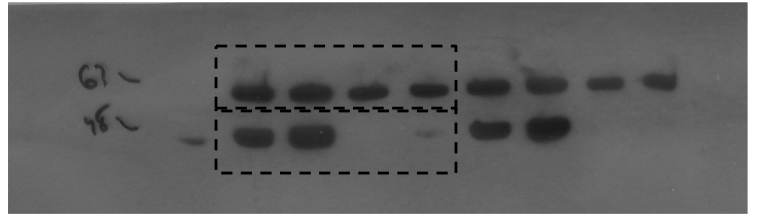

$\alpha$ -SMA

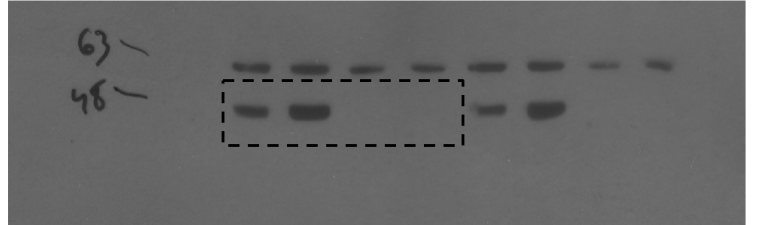

RAS

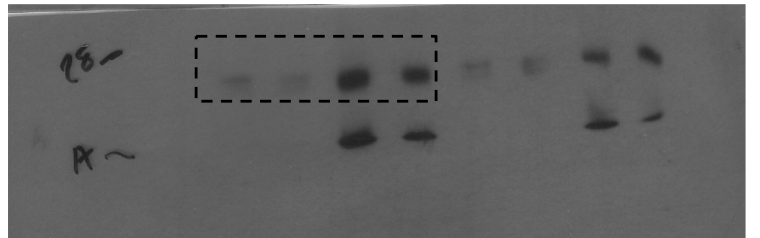

IL8

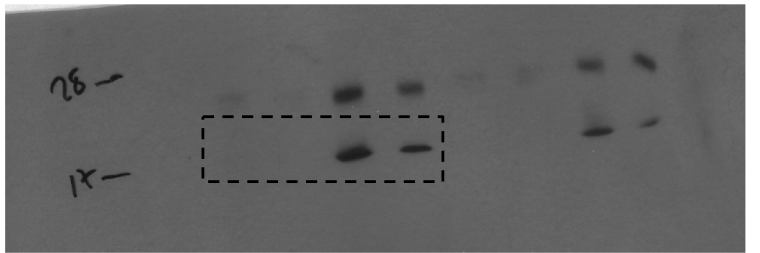

Supplement: ACEL-21-e13580-s003.pdf [file ACEL-21-e13580-s003.pdf]
