# Supplementary material for: Dynamic regulation of myofibroblast phenotype in cellular senescence
Source: PubMed Central journal article supplement (PMC9009235; doi:10.1111/acel.13580), 2022-03-09
Supplement: ACEL-21-e13580-s001.pdf [file ACEL-21-e13580-s001.pdf]

## Supp Table 1

### Primers for QPCR (5' to 3')

| Gene                 | Forward primer            | Reverse primer            |
|----------------------|---------------------------|---------------------------|
| Human <i>ACTA2</i>   | CCGACCGAATGCAGAAGGA       | ACAGAGTATTTGCGCTCCGAA     |
| Human <i>BMP2</i>    | TCCATGTGGACGCTCTTTCA      | GGTCGACCTTTAGGAGACCG      |
| Human <i>BMP4</i>    | CCACAGCACTGGTCTTGAGT      | CCAGATGTTCTTCGTGGTGGGA    |
| Human <i>BMP7</i>    | GTGTGCCTTCCCTCTGAACT      | CGTTTCCGGGTTGATGAAGTG     |
| Human <i>COL1A1</i>  | CAGCCGCTTCACCTACAGC       | TTTTGTATTCAATCACTGTCTTGCC |
| Human <i>COL1A2</i>  | GGCCCTCAAGGTTTCCAAGG      | CACCCTGTGGTCCAACAACCTC    |
| Human <i>COL3A1</i>  | AATCAGGTAGACCCGGACGA      | TTCGTCCATCGAAGCCTCTG      |
| Human <i>GDF15</i>   | CCTGCAGTCCGGATACTCAC      | CCCGAGAGATACGCAGGTG       |
| Human <i>HEY1</i>    | CCGCTGATAGGTTAGGTCTCATTTG | TCTTTGTGTTGCTGGGGCTG      |
| Human <i>ID4</i>     | ACTGCGCTCAACACCGACCC      | GGCCGCACACCTGGACAGC       |
| Human <i>IL6</i>     | GATGAGTACAAAAGTCTGATCCA   | CTGCAGCCACTGGTTCTGT       |
| Human <i>IL8</i>     | AGACAGCAGAGCACACAAGC      | ATGGTTCCTTCCGGTGGT        |
| IKBalpha mut         | GCCGGCCTGGACGCCAT         | GGCACCTCCTGCGGCTC         |
| Human <i>TGFB1</i>   | CCACCATCACCAACAACATCCAG   | GCCGTTACCTTCAAGCATCGTG    |
| Human <i>TGFB111</i> | CATGTCTCAGTTCCCATCTAGCA   | GGAAGGGAGGCTGGGTCTTT      |
| Human <i>TGFB2</i>   | ATTTGCAGGTATTGATGGCACC    | AGATGTGGGGTCTTCCCACT      |
| Human <i>TGFB3</i>   | TGCGTGAGTGGCTGTTGAGAAG    | CCATTGGGCTGAAAGGTGTGAC    |
| Mouse <i>Acta2</i>   | CGTACAACCTGGTATTGTGCTGGAC | TGATGTCACGGACAATCTCACGCT  |
| Mouse <i>Col1a1</i>  | TTCTCCTGGCAAAGACGGACTCAA  | AGGAAGCTGAAGTCATAACCGCCA  |
| Mouse <i>Il6</i>     | GATGGATGCTACCAAACCTGGAT   | CCAGGTAGCTATGGTACTCCAGA   |
| <i>GFP</i>           | CTACCCCGACCACATGAAGC      | AAGAAGATGGTGCCTCCTG       |
| 18S rRNA             | CCAGTAAAGTGCGGGTCATAAGC   | CCTCACTAAACCATCCAATCGG    |

### Primary antibodies

| Protein       | Reference and source     | Dilution                |
|---------------|--------------------------|-------------------------|
| Actin         | A5441, Sigma             | 1:10000 (WB)            |
| Collagen I    | ab34710, Abcam           | 1:1000 (IF)             |
| ERK           | sc93, Santa Cruz         | 1:500                   |
| Phospho-ERK   | sc7383, Santa Cruz       | 1:500                   |
| Fibronectin 1 | F3648, Sigma             | 1:400 (IF)              |
| IL8           | MAB208, R&D              | 1:500 (WB)              |
| IL8           | 511406, Biolegend (FITC) | 1:1000 (IF)             |
| Ki67          | RM-9106, Neomarkers      | 1:500 (IF)              |
| Pan-RAS       | sc-166691, Santa Cruz    | 1:200 (WB)              |
| p16           | JC8, CRUK                | 1:50 (WB)               |
| p21           | sc-397-G, Santa Cruz     | 1:500 (WB)              |
| p53           | sc-126, Santa Cruz       | 1:500 (WB)              |
| SIX1          | HPA001893, Sigma         | 1:500 (WB)              |
| $\alpha$ -SMA | M0851, Dako              | 1:500 (WB)              |
| $\alpha$ -SMA | C6198, Sigma (Cy3)       | 1:750 (IF)              |
| $\alpha$ -SMA | A5228, Sigma             | 1:500 (IF)              |
| SMAD2         | 5339, Cell Signaling     | 1:500 (WB)<br>1:50 (IF) |
| Phospho-SMAD2 | 3108, Cell Signaling     | 1:1000 (WB)             |
| Tubulin       | T9026, Sigma             | 1:10000 (WB)            |

WB: Western Blot, IF: immunofluorescence

## Secondary antibodies

| <b>Protein</b>               | <b>Reference and source</b> | <b>Dilution</b> |
|------------------------------|-----------------------------|-----------------|
| Goat anti-mouse HRP          | P0447, Dako                 | 1:5000          |
| Monkey anti-rabbit HRP       | NA934V, GE Healthcare       | 1:5000          |
| Rabbit anti-goat HRP         | P0160, Dako                 | 1:5000          |
| Donkey anti-rabbit-Alexa 488 | A21206, Invitrogen          | 1:500           |
| Donkey anti-rabbit-Alexa 555 | A31572, Invitrogen          | 1:500           |
| Donkey anti-mouse-Alexa 546  | A10036, Invitrogen          | 1:500           |
| Donkey anti-mouse-Alexa 488  | A21202, Invitrogen          | 1:500           |
