# Supplementary material for: Dynamic regulation of myofibroblast phenotype in cellular senescence
Source: PubMed Central journal article supplement (PMC9009235; doi:10.1111/acel.13580), 2022-03-09
Supplement: ACEL-21-e13580-s002.pdf [file ACEL-21-e13580-s002.pdf]

Supp Table 2

|    |                        |  |                                                                                                     |                                                                                        |                                                                                              |                                                                                        |                                                                                               |                                                                                                                  |                                               |  |  |  |
|----|------------------------|--|-----------------------------------------------------------------------------------------------------|----------------------------------------------------------------------------------------|----------------------------------------------------------------------------------------------|----------------------------------------------------------------------------------------|-----------------------------------------------------------------------------------------------|------------------------------------------------------------------------------------------------------------------|-----------------------------------------------|--|--|--|
| UP | Cluster 3<br>12 genes  |  | KEGG: Cytokine-cytokine receptor interaction (IL1B, CXCL8, CXCL1, IL1A, CXCL5) q=1.16E-9            | KEGG: TNF signaling pathway (IL1B, CXCL1, CXCL5, MMP3) q=0.00003247                    | Wikipathways: Senescence and autophagy in cancer (CXCL8, CXCL1, IL1B, IL1A, IL24) q=1.393E-7 | Reactome: Signaling by qPCR (CXCL5, CXCL1, CXCL8, C3, CCL7, MMP3) q=0.000037           | Biocarta: NFKB signaling (IL1A) q=0.01                                                        | Jensen compartments: Extracellular space (IL1A, CXCL1, IL1B, MMP3, IL24, CCL7, C3, IL13RA2, CXCL5) q=0.000001063 |                                               |  |  |  |
|    | Cluster 11<br>19 genes |  | KEGG: Cytokine-cytokine receptor interaction (IL6, IL11, CXCL10, CCL20, CXCL3, TNFSF15) q=0.0000054 | KEGG: TNF signaling pathway (IL6, CXCL10, CCL20, CXCL3) q=0.00007088                   | Wikipathways: Senescence and autophagy in cancer (IL6, TNFSF15, SERPINB2) q=0.003268         | Reactome: G alpha signaling events (CXCL10, CCL20, CXCL3, RGS1B) q=0.004354            |                                                                                               |                                                                                                                  |                                               |  |  |  |
|    | Cluster 12<br>8 genes  |  | GO Cellular component: ER-Golgi (AREG) q=0.03                                                       | Wikipathways: Matrix metalloproteinases (MMP1) q=0.02                                  | Reactome: Collagen degradation (MMP1) q=0.05                                                 |                                                                                        |                                                                                               |                                                                                                                  |                                               |  |  |  |
|    | Cluster 16<br>7 genes  |  | KEGG: ECM-receptor interaction (TGA10) q=0.05                                                       | GO Molecular function: Protein binding involved in cell-matrix adhesion (TGA10) q=0.01 | KEGG: Notch signaling pathway (DLL4) q=0.05                                                  | Wikipathways: Notch regulation of human endothelial cell calcification (DLL4) q=0.05   |                                                                                               |                                                                                                                  |                                               |  |  |  |
|    | Cluster 17<br>12 genes |  | Wikipathways: Senescence and autophagy in cancer (PLAT, BMP2) q=0.01698                             | Wikipathways: Quercetin and NFkBAP-1 induced cell apoptosis (PTGS2) q=0.04             | Reactome: Signaling by BMP (GREM2, BMP2) q=0.002653                                          | Reactome: Dissolution of fibrin clot (PLAT) q=0.033                                    |                                                                                               |                                                                                                                  |                                               |  |  |  |
|    | Cluster 18<br>31 genes |  | GO Biological process: Mesodermal cell differentiation (ITGA2, HMGA2) q=0.002965                    | Biocarta: Platelet amyloid precursor protein pathway (PLAU) q=0.03                     | Biocarta: Fibrinolysis pathway (PLAU) q=0.03                                                 | KEGG: Mineral absorption (MT2A, MT1E, MT1L) q=0.001                                    | GO Biological process: Cellular response to ions (MTL1, MT1E, MT2A) q=0.00057                 |                                                                                                                  |                                               |  |  |  |
|    | Cluster 13<br>16 genes |  | Biocarta: CD40L signaling pathway (TNFAIP3) q=0.01                                                  |                                                                                        |                                                                                              |                                                                                        |                                                                                               |                                                                                                                  |                                               |  |  |  |
|    | Cluster 10<br>7 genes  |  | GO Molecular function: BMP binding (GREM1) q=0.01                                                   | Reactome: Amino acid transport across the plasma membrane (SLC7A2) q=0.04              |                                                                                              |                                                                                        |                                                                                               |                                                                                                                  |                                               |  |  |  |
|    | Cluster 6<br>13 genes  |  | KEGG: Apoptosis (CTSK, ERN1) q=0.01                                                                 | GO Biological process: Positive regulation of ECM disassembly (PDFN) q=0.05            | Wikipathways: Osteoclast signaling (TNFRSF11B, CTSK) q=0.00062                               | Wikipathways: TGFB signaling pathway (TGIF1) q=0.1                                     | Kinase perturbations: TGFB2 knockout (perturbations) (TNFRSF11B, CTSK, NIAK2, PDE7B) q=0.0018 | Reactome: Metal ion transporters (SLC39A14, SLC11A2) q=0.0049                                                    | KEGG: Lysosome (CTSK, SLC11A2, ARSG) q=0.0008 |  |  |  |
|    | Cluster 14<br>24 genes |  | Biocarta: IL6 signaling pathway (CEBFB) q=0.05                                                      | Panther: Apoptosis signaling pathway (MCL1, RELB) q=0.04                               | GO Biological process: Positive regulation of myoblast differentiation (RIPOR2, BTG1) q=0.04 | Wikipathways: Myometrial relaxation and contraction pathways (MAFF, ETS2, GJA1) q=0.02 |                                                                                               |                                                                                                                  |                                               |  |  |  |
|    | Cluster 15<br>29 genes |  | KEGG: TNF signaling pathway (NFKBIA, CCL2, ICAM1, LIF) q=0.0001                                     | Reactome: Anchoring fibril formation (LAMB3, COL7A1) q=0.01                            | GO Biological process: Positive regulation of cellular extravasation (RIPOR2, ICAM1) q=0.01  | Wikipathways: Complement and coagulation cascades (PLAUR, BDKRB1) q=0.05               |                                                                                               |                                                                                                                  |                                               |  |  |  |
|    | Cluster 19<br>30 genes |  | KEGG: TNF signaling pathway (MAPK13, IKBKB, VEGFC) q=0.01                                           | Wikipathways: Heart development (VEGFC, SMAD1) q=0.05                                  | Biocarta: Keratinocyte differentiation (MAPK13, IKBKB) q=0.03                                | Panther: TGFB signaling pathway (MAPK13, SMAD1) q=0.09                                 |                                                                                               |                                                                                                                  |                                               |  |  |  |
|    | Cluster 20<br>19 genes |  | Reactome: Integrin cell surface interactions (ITGA6, COL13A1) q=0.08                                | Reactome: Collagen formation (ITGA6, COL13A1) q=0.08                                   |                                                                                              |                                                                                        |                                                                                               |                                                                                                                  |                                               |  |  |  |

|      |                       |  |                                                                                                               |                                                                                                                      |                                                                                                         |                                                                                                 |                                                                                       |                                            |  |  |  |
|------|-----------------------|--|---------------------------------------------------------------------------------------------------------------|----------------------------------------------------------------------------------------------------------------------|---------------------------------------------------------------------------------------------------------|-------------------------------------------------------------------------------------------------|---------------------------------------------------------------------------------------|--------------------------------------------|--|--|--|
| DOWN | Cluster 4<br>9 genes  |  | GO Biological Process: Muscle hypertrophy (HTR2B) q=0.04                                                      | GO Biological Process: Blood vessel diameter (HTR2B) q=0.04                                                          | Mammalian phenotype: Cardiovascular system physiology (TNNT2, HTR2B) q=0.04                             | Mammalian phenotype: Abnormal heart development (TNNT2, HTR2B) q=0.03                           |                                                                                       |                                            |  |  |  |
|      | Cluster 8<br>41 genes |  | KEGG: Vascular smooth muscle contraction (GUCY1B3, ADRA1B, ACTA2) q=0.07                                      | KEGG: Myometrial relaxation and contraction (OXR, CORIN, ACTA2, IGFBP3) q=0.005                                      | KEGG: Focal adhesion-P13K-AKT/TOR (PDGFR, COL11A1, FGF9) q=0.14                                         | GO Molecular function: Type II transforming growth factor b receptor binding (BAMBI) q=0.09     | Panther: TGFB signaling (GDFS, BAMBI) q=0.13                                          |                                            |  |  |  |
|      | Cluster 7<br>59 genes |  | Reactome: Smooth muscle contraction (ACTG2, TPM2) q=0.8                                                       | Reactome: Extracellular matrix organization (SDC2, NTN4, COL8A2, BMP4) q=0.6                                         | GO Biological Process: Cell differentiation involved in metanephros development (DSR1, BMP4) q=0.04     | GO Biological Process: Cell migration involved in heart development (PDGFRB, SNAI2) q=0.03      | GO Biological Process: Cardiac muscle cell differentiation (BMP4, EFNB2) q=0.04       | Reactome: TGFB signaling (ID2, BMP4) q=0.8 |  |  |  |
|      | Cluster 9<br>30 genes |  | GO Biological Process: Positive regulation of smooth muscle cell proliferation (STAT1, IL6R, HMOX1) q=0.00579 | Reactome: Extracellular matrix organization (MFAP4, FBN2, TGFB2, COL14A1, ADAMTS5, ADAMTS1, ADAMTS8, VCAM1) q=1.1E-6 | GO Biological Process: Extracellular matrix organization (TGFB2, COL14A1, ADAMTS5, FBN2, VCAM1) q=0.005 | GO Biological Process: Embryo development ending in birth or egg hatching (TGFB2, STOX2) q=0.02 | Wikipathways: Endochondral ossification (TGFB2, STAT2, ADAMTS5, ADAMTS1) q=0.00009818 |                                            |  |  |  |
|      | Cluster 2<br>44 genes |  | GO Cellular component: Cytoskeleton (CNN2, CNN1, MARCKS, CNN3, CDC42EP3, MTCL1, LIMOD1) q=0.002               | GO Cellular component: Focal adhesion (CNN2, CNN1, MARCKS, CNN3, LIMS2, FHL2, TES) q=0.0005                          | GO Cellular component: Rough endoplasmic reticulum (TRAM2, TRAM1) q=0.02                                |                                                                                                 |                                                                                       |                                            |  |  |  |

|      |     |       |         |             |                              |        |        |       |
|------|-----|-------|---------|-------------|------------------------------|--------|--------|-------|
| SASP | ECM | NOTCH | TGFBeta | Coagulation | Differentiation, development | Muscle | Metals | Other |
|------|-----|-------|---------|-------------|------------------------------|--------|--------|-------|
